# Supplementary material
Source: PubMed Central journal article supplement (PMC4334242)
Supplement: ac503716z_si_001.pdf [file ac503716z_si_001.pdf]

## SUPPORTING INFORMATION

### Effects of physiologic mechanical stimulation on embryonic chick cardiomyocytes using a microfluidic cardiac cell culture model.

Mai-Dung Nguyen<sup>1</sup>, Joseph P. Tinney<sup>2</sup>, Fei Ye<sup>2</sup>, Ahmed Elnakib<sup>1</sup>, Fangping Yuan<sup>2</sup>, Ayman El-Baz<sup>1</sup>, Palaniappan Sethu<sup>4</sup>, Bradley B. Keller<sup>1,2,3,\*</sup>, Guruprasad A. Giridharan<sup>1,\*</sup>

<sup>1</sup>Departments of Bioengineering and Mechanical Engineering, Speed School of Engineering, University of Louisville, Louisville, Kentucky 40208, United States

<sup>2</sup>Kosair Charities Pediatric Heart Research Program, University of Louisville, Louisville, Kentucky 40202, United States

<sup>3</sup>Department of Pediatrics, School of Medicine, University of Louisville, Louisville, Kentucky 40202, United States.

<sup>4</sup>Division of Cardiovascular Disease, Departments of Medicine and Biomedical Engineering, University of Alabama, Birmingham, Alabama 35294

\*co-mentors

#### ABSTRACT

The stress, strain, membrane deflection, and Young's modulus of the PDMS membrane of the cardiac cell culture model was calculated from experimental data for membrane thicknesses of 250  $\mu\text{m}$ , 400  $\mu\text{m}$ , and 500  $\mu\text{m}$ . These results demonstrated that the cardiomyocytes experienced physiologic levels of stretch and circumferential and radial strains during the mechanical stimulation.

## **METHODS**

### **Tensile test for Young's modulus of the PDMS membrane**

The fabrication of thin PDMS membrane was accomplished using standard soft lithography techniques.<sup>1,2</sup> This thin cured PDMS sheet was then cut into strips (0.5 inch x 4.0 inches) and vertically mounted to the fixtures of the RSA III Rheumatics System Analyzer. Zero force was initialized. The membrane was pulled slowly with the rate of 0.5 mm/s until it reached a 50% displacement (2 inches). The stress, strain, and Young modulus of the PDMS were calculated for three different thicknesses (250  $\mu\text{m}$ , 400  $\mu\text{m}$ , and 500  $\mu\text{m}$ ).

### **Experimental quantification of membrane deflection:**

A Finite Element Analysis (FEA) was used to estimate the membrane deflection and strain.<sup>1</sup> Additionally, Visual Sonics Imaging System (VisualSonics Inc, a subsidiary of Fuji-FILM, Toronto, Canada) with a MS-400 probe (30MHz) was used to examine the displacement of the membrane inside the CCCM set-up system (Fig. S1). 500  $\mu\text{m}$  thick PDMS membranes were used. The CCCM was operated with a flow rate of 44 $\mu\text{l}$ /cycle, peak cyclic pressure of 10mmHg, and a frequency of 2 Hz with 40% diastolic fraction. Further, the deflecting movement of the PDMS membrane was recorded for ejection volumes of 25, 50, and 75  $\mu\text{l}$  to determine the membrane deflection and the strain values.

## **RESULTS**

### **Young's modulus of the PDMS membrane**

The stress-strain relationship of the PDMS membrane were similar for PDMS thicknesses of 250  $\mu\text{m}$  - 500  $\mu\text{m}$  (Fig. S2) and yielded a Young's modulus of approximately 1.0 MPa. These results were in agreement with values published in literature.<sup>3-5</sup>

## Membrane Deflection and Strain Estimation

Chick embryonic left ventricle cardiomyocytes were used in the CCCM and thus, the system was characterized based on the strain of the *in-vivo* chick embryonic left ventricle cardiomyocytes on the Hamburger Hamilton stage 31; which is approximately 0.10-0.20.<sup>6,7</sup> For *in-vitro* culture, a strain of 8-15% was applied.

Figure S3 demonstrates the deflection of the membrane based on different fluid volume loaded to the cell culture chamber. To ensure that the cells experienced suitable stretches during the mechanical stimulation, both circumferential and radial strain of the membrane were determined via videos of the experimental membrane deflection obtained from the Ultra Sound system (Fig. 4). For each run, the deflecting movement of the PDMS membrane was converted to single moving slides (30 slides/sec). Referent points from the base line and the displacement points along the deflected membranes were created evenly along the membrane diameter using m-files written in Matlab (MathWorks, Natick, MA). The deflection profile was then created to calculate the strains.<sup>5</sup> The strains obtained in this real set-up CCCM system for chick embryonic culturing are shown in Figure S4.

## FIGURE LEGENDS:

**Figure S1:** Images of experimental set up for making movies of the PDMS membrane deflections using high frequency ultrasound. [A] Image of the Vevo2100 VisualSonics high frequency ultrasound system used for the PDMS strain measurement. [B] Experimental set-up for the strain measurement with [1] probe and [2] CCCM platform where the CCCM culture chamber was installed.

**Figure S2:** Graphs of stress versus strain of thin PDMS sheets. [A] Plot of engineering stress versus engineering strain of the thin PDMS sheets. [B] Plot of the true stress versus true strain of the thin PDMS sheet; this plot was used to determine the Young's Modulus of the PDMS membrane. N= 5

**Figure S3:** Images of PDMS membrane deflections and the graph of the strain at 0, 25, 50 and 75  $\mu\text{l}$  fluid loaded to the cell chamber along with the amount of fluid loaded in the real set-up experiment for chick embryonic ventricle myocyte experiment. From these images, the level of membrane stretch from the real chick embryonic culturing experiment is located between 25 $\mu\text{l}$  and 50 $\mu\text{l}$  injections.

**Figure S4:** Graphs of circumferential strain [A] and radial strain [B] of the 500 $\mu\text{m}$  PDMS membrane in the real set-up CCCM system. The center lines of both graphs were the strain values used for the chick embryonic ventricular cardiomyocyte culturing experiment. The bottom

and the top line were the strain values of the PDMS membrane obtained from manual fluid injection (25 $\mu$ l and 50 $\mu$ l). N = 3.

**Figure S1A:**

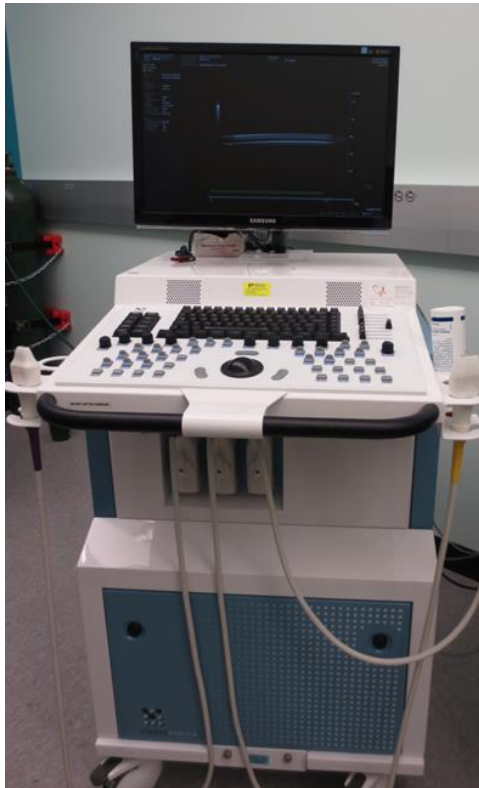

**Figure S1B:**

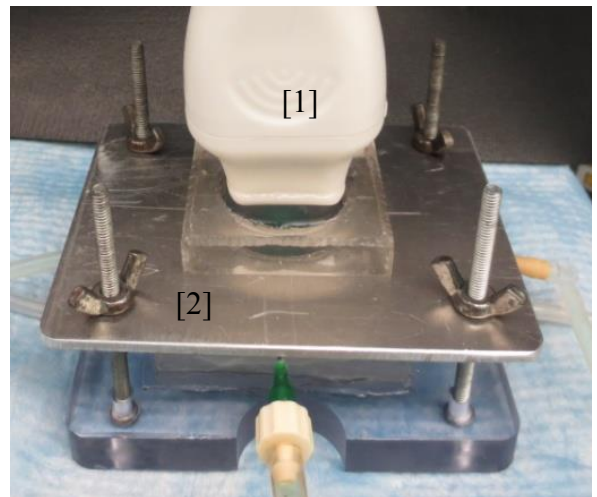

**Figure S2A:**

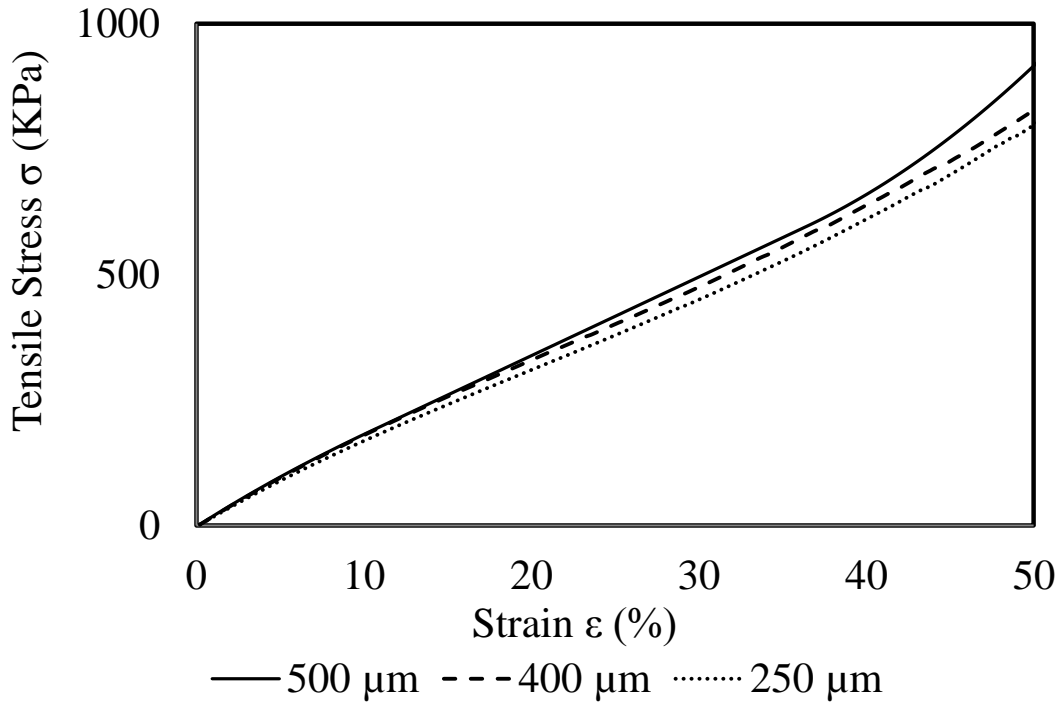

**Figure S2B**

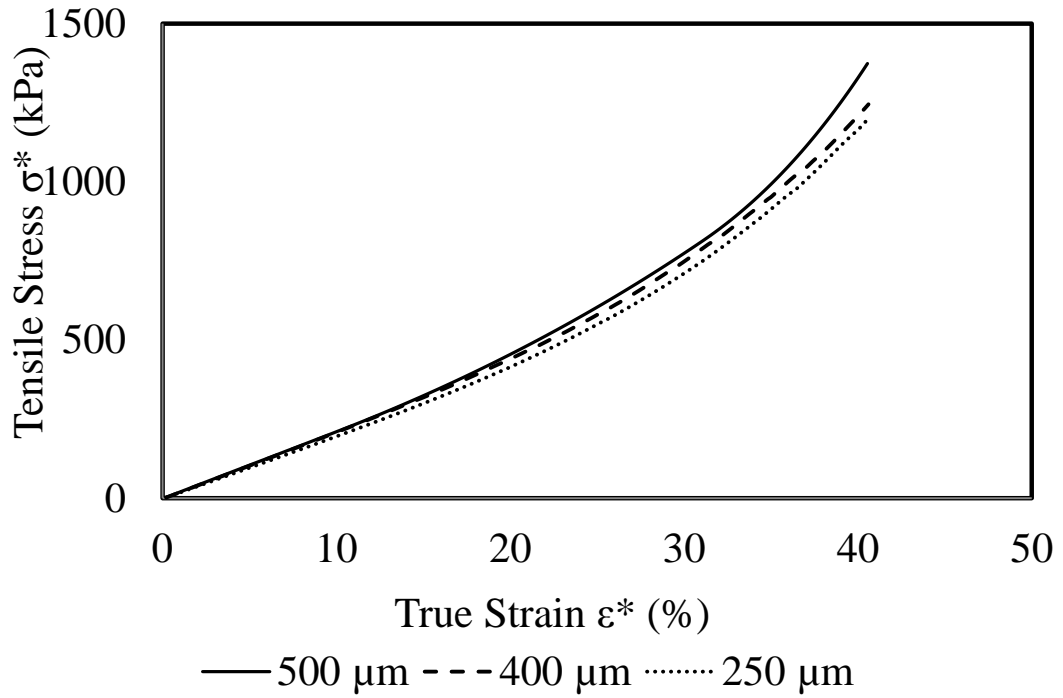

**Figure S3:**

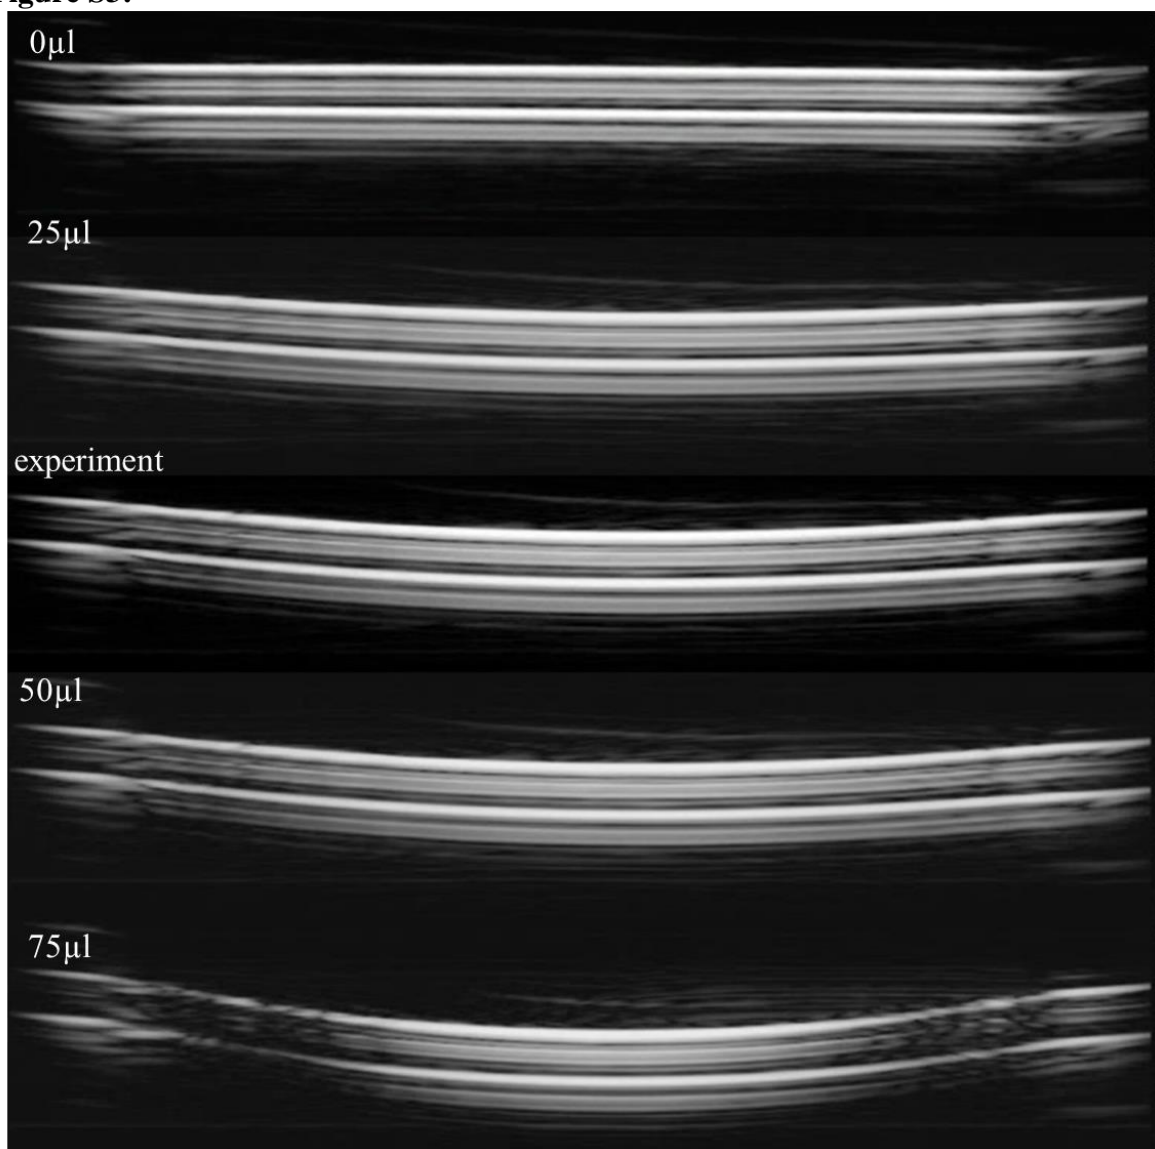



Figure S4A:

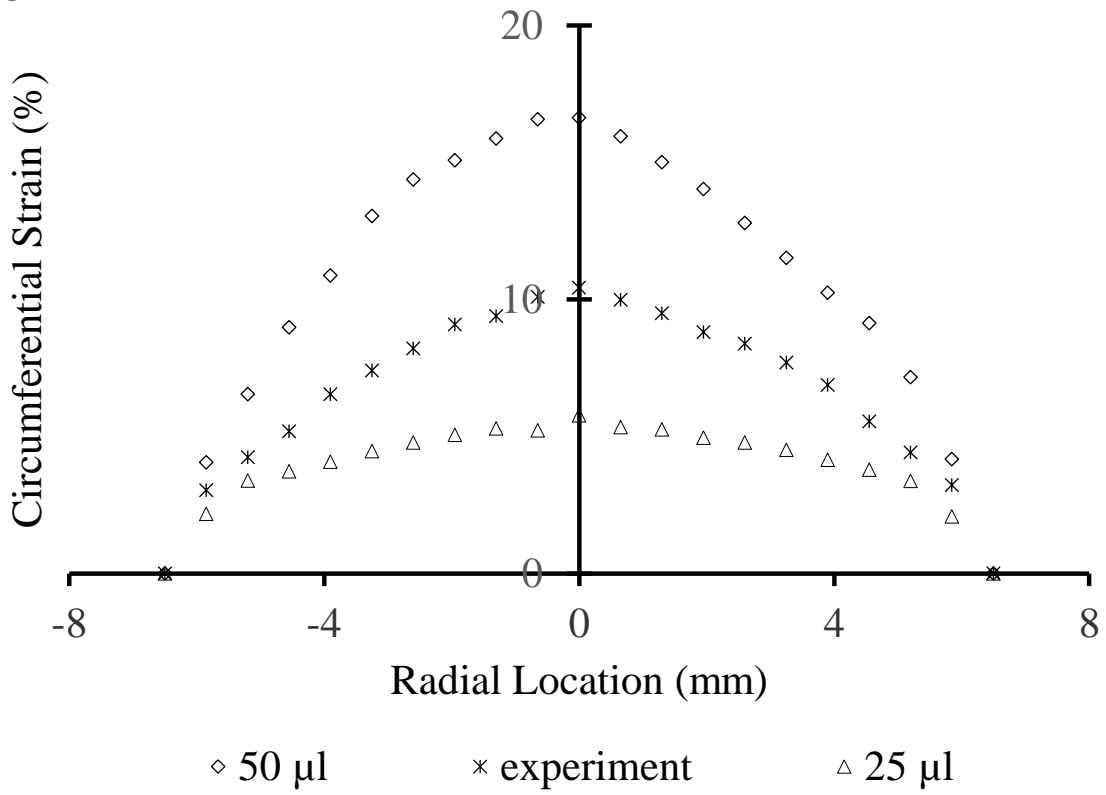

Figure S4B:

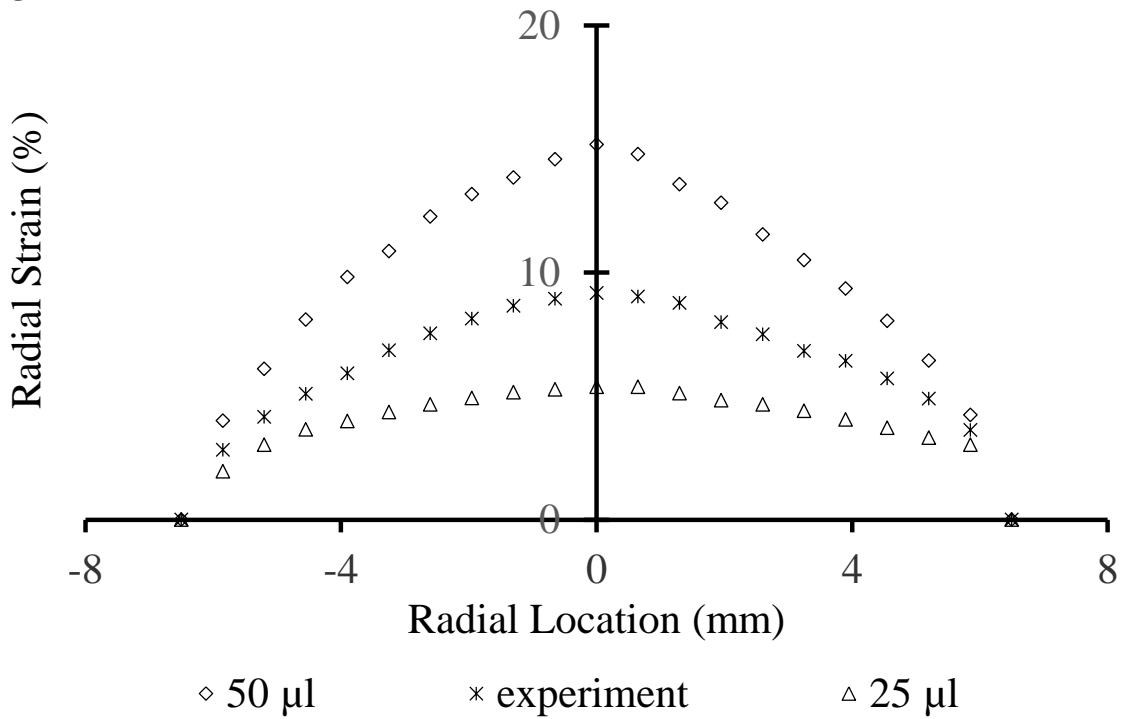

## REFERENCES:

- (1) Nguyen, M. D.; Tinney, J. P.; Yuan, F. P.; Roussel, T. J.; El-Baz, A.; Giridharan, G.; Keller, B. B.; Sethu, P. *Analytical Chemistry* **2013**, *85*, 8773-8779.
- (2) Estrada, R.; Giridharan, G. A.; Nguyen, M. D.; Roussel, T. J.; Shakeri, M.; Parichehreh, V.; Prabhu, S. D.; Sethu, P. *Analytical Chemistry* **2011**, *83*, 3170-3177.
- (3) Clause, K. C.; Tinney, J. P.; Liu, L. J.; Keller, B. B.; Tobita, K. *Tissue Eng Part A* **2009**, *15*, 1373-1380.
- (4) Khanafer, K.; Duprey, A.; Schlicht, M.; Berguer, R. *Biomedical Microdevices* **2009**, *11*, 503-508.
- (5) Liu, M.; Sun, J. R.; Sun, Y.; Bock, C.; Chen, Q. F. *Journal of Micromechanics and Microengineering* **2009**, *19*.
- (6) Liu, M.; Chen, Q. F. *Journal of Micro/Nanolithography Memes and Moems* **2007**, *6*.
- (7) Taber, L. A.; Sun, H.; Clark, E. B.; Keller, B. B. *Circulation Research* **1994**, *75*, 896-903.
